# Supplementary material for: Al pairing in 8-membered rings drives superior methanol amination on CHA zeolites
Source: Royal Society of Chemistry journal article supplement (doi:10.1039/d5qi02464a), 2026-01-01
Supplement: d5qi02464a1.pdf [file d5qi02464a1.pdf]

Supplementary Information (SI) for Inorganic Chemistry Frontiers.

This journal is © the Partner Organisations 2026

## Supplementary Information

### Al pairing in 8-membered rings drives superior methanol amination on CHA zeolites

Shuang Liu,<sup>a</sup> Pan Xu,<sup>a</sup> Sihui Li,<sup>a</sup> Junyao Pan,<sup>a</sup> Yuxin Yan,<sup>a</sup> Rui Wu,<sup>b</sup> Junhui Guo,<sup>c</sup> Chang Liu<sup>c\*</sup> and Wenfu Yan<sup>a\*</sup>

<sup>a</sup> State Key Laboratory of Inorganic Synthesis and Preparative Chemistry, College of Chemistry, Jilin University, Changchun 130012, China

<sup>b</sup> Chongqing Key Laboratory of Green Catalytic Materials and Technology, College of Chemistry, Chongqing Normal University, Chongqing 401331, China

<sup>c</sup> SINOPEC (Dalian) Research Institute of Petroleum and Petrochemicals Co., Ltd., Dalian 116045, P.R. China

**\*Corresponding authors:**

E-mail: liuchang.fshy@sinopec.com (Chang Liu), yanw@jlu.edu.cn (Wenfu Yan).

## 1. Experimental section

### 1.1 Materials and chemicals

Fumed silica (Xuzhou Tiancheng Chlor\_alkali Co., Ltd), tetraethyl orthosilicate (Sinopharm Chemical Reagent Co., Ltd), aluminum isopropoxide (Tianjin Fuchen), pseudoboehmite (Sasol, 72.7 wt.%), phosphate acid (Tianjin Jindongtianzheng Precision Chemical Reagent Factory, 85%), sodium hydroxide (Tianjin Tiantai Chemical Co., Ltd, 98%), potassium hydroxide (Tianjin Xinbote Chemical Co., Ltd, 85%), cesium hydroxide monohydrate (Aladdin, 95%), ammonium fluoride (Macklin, 98%), *N,N,N*-Trimethyladamantan-1-aminium hydroxide (TMAdaOH, Kente Catalysts

Inc., 25%), morpholine (Tianjin Fuchen Chemical Reagent Factory), ammonium acetate (Xilong Scientific, 98%), cobalt nitrate hexahydrate (Macklin, 99%), deionized water.

## 1.2 Synthesis of SAPO-34 and SSZ-13 seeds

SAPO-34 seeds were synthesized following the procedure described in *Verified Synthesis of Zeolitic Materials, 3<sup>rd</sup> revised edition* published by the Synthesis Commission of the International Zeolite Association (IZA).<sup>1</sup> In a 100 mL glass beaker, 45.63 g of deionized water, 10.27 g of phosphoric acid, and 5.89 g of pseudoboehmite were combined and stirred at room temperature for 2 h. Subsequently, 2.73 g of fumed silica and 7.73 g of morpholine were added, followed by stirring for another 2 h. The resulting mixture was transferred into a 100 mL Teflon-lined stainless-steel autoclave and kept at 38 °C for 24 h. Hydrothermal treatment was then carried out at 200 °C for 24 h. The solid product was recovered by filtration, washed with 500 mL of deionized water, and dried at 80 °C overnight.

Commercial SSZ-13 (Si/Al = 7.8) was obtained from China Catalyst Holding Co., Ltd. Both SAPO-34 and SSZ-13 were calcined in air at 600 °C for 10 h to remove the organic structure-directing agent (OSDA). The calcined products are denoted as c-SAPO-34 and c-SSZ-13, respectively.

## 1.3 Synthesis of pure silica CHA seeds

Pure silica CHA (PS-CHA) seeds were synthesized based on a reported procedure with slight modifications.<sup>2</sup> In a 50 mL plastic beaker, 4.50 g of tetraethyl orthosilicate, 7.99 g of *N,N,N*-trimethyl-1-adamantyl ammonium hydroxide solution, and 5.40 g of deionized water were mixed and stirred at room temperature until the water completely evaporated. The beaker was sealed and placed in a lyophilizer for freeze-drying over two days. The dried solid was ground, mixed with 0.37 g of ammonium fluoride, and homogenized by further grinding. The mixture was then transferred to a 15 mL Teflon-lined stainless-steel autoclave and crystallized at 150 °C for 7 days. The product was

washed with deionized water, centrifuged, and dried. Finally, PS-CHA was calcined in air at 600 °C for 10 h, yielding c-PS-CHA.

#### 1.4 Synthesis of CHA zeolites

**CHA** zeolites were synthesized using gels with the molar composition: 20 SiO<sub>2</sub>: 1 Al<sub>2</sub>O<sub>3</sub>: 6 Na<sub>2</sub>O: (1 Na<sub>2</sub>O or 1 K<sub>2</sub>O or 1 Cs<sub>2</sub>O): 2000 H<sub>2</sub>O: 20% seeds (relative to SiO<sub>2</sub>).

The synthesis proceeded as follows: deionized water, alkali, and aluminum isopropoxide were mixed according to the target gel ratio and stirred for 4 h until a clear solution formed. Fumed silica was then added and stirred for another 2 h. Seed crystals (SAPO-34, SSZ-13, or PS-CHA; 20 wt.% of SiO<sub>2</sub>) were introduced and stirred for 1 h. The mixture was transferred into a 25 mL Teflon-lined stainless-steel autoclave and crystallized at 160 °C for 24 h under static condition.

The solids were recovered by filtration, washed with deionized water, and dried at 80 °C overnight. The use of different seed types yielded samples denoted as CHA-S34-3.4, CHA-S13-4.1, and CHA-PS-4.3 in the Na–Cs system. To vary the Si/Al ratio, the aluminum isopropoxide content was adjusted, producing CHA-S34-3.8 and CHA-PS-3.8. The numbers in the sample names represent the Si/Al ratio.

Owing to the presence of OSDAs, the samples CHA-PS-4.3 and CHA-PS-3.8 were subjected to calcination at 600 °C for 6 h in air to eliminate the organic species. All five synthesized **CHA** zeolites were ion-exchanged three times with 1 mol/L CH<sub>3</sub>COONH<sub>4</sub> solution (solid-to-liquid ratio 1: 50) at 80 °C for 4 h per cycle. After each exchange, the solids were filtered, washed, and dried at 80 °C, followed by calcination at 550 °C in air for 4 h. The final products were designated as H-CHA-S34-3.4, H-CHA-S13-4.1, H-CHA-PS-4.3, H-CHA-S34-3.8, and H-CHA-PS-3.8.

#### 1.5 Co-exchange

The five **CHA** zeolites were first converted to the Na<sup>+</sup> form by ion exchange with 1 mol/L NaCl solution at 80 °C for 2 h, repeated twice. The resulting Na-CHA samples were then exchanged twice with 0.5 mol/L Co(NO<sub>3</sub>)<sub>2</sub> solution at 80 °C for 6 h. The

exchanged products were filtered, washed with deionized water, and dried at 80 °C overnight. The Co content of the dehydrated samples was determined by ICP-OES.

## 1.6 Characterization

Powder X-ray diffraction (PXRD) was performed on a Rigaku D/Max 2550 diffractometer using Cu K $\alpha$  radiation ( $\lambda = 1.5418 \text{ \AA}$ ) over the range of  $2\theta = 4\text{--}40^\circ$  at a scan rate of  $12^\circ/\text{min}$ . The relative crystallinity corresponds to:

$$\text{Relative Crystallinity} = \frac{\sum A(\text{characteristic peaks})}{\sum A(\text{characteristic peaks of reference sample})} \times 100\%$$

where A is the peak area of a characteristic peak.

Characteristic peaks of **CHA** zeolite at  $2\theta = 9.8^\circ, 13.2^\circ, 20.9^\circ, 23.4^\circ, 25.2^\circ, 28.4^\circ, 31.0^\circ, 31.4^\circ, 31.9^\circ$ , and  $33.7^\circ$  were taken into account for the calculation of relative crystallinity of **CHA** zeolite. Morphology and microstructure were examined by field emission scanning electron microscopy (SEM, JSM-7800F). Thermogravimetric (TG) analysis was carried out on a TA TGA Q500 with a heating rate of  $10^\circ\text{C}/\text{min}$  in air. Chemical compositions were determined using a Thermo Scientific iCAP 7600 DUO ICP-OES.  $\text{N}_2$  adsorption–desorption isotherms were measured at 77 K on a BSD-660M A6MB6M analyzer. Surface area, external surface area, and micropore volume were derived using the Brunauer-Emmett-Teller (BET) equation and t-plot method. Total pore volume was calculated from the amount of  $\text{N}_2$  adsorbed at  $P/P_0 = 0.99$ .

Solid-state  $^{27}\text{Al}$ ,  $^{29}\text{Si}$ , and  $^{31}\text{P}$  magic angle spinning nuclear magnetic resonance (MAS NMR) spectra were collected on a Bruker Avance NEO spectrometer at 14.09 T. Spectra were deconvolved with Gaussian functions. The Si/Al ratio was calculated from the NMR data using the following formula:

$$\left(\frac{\text{Si}}{\text{Al}}\right)^{\text{NMR}} = \frac{\sum_{n=0}^{n=4} I_{\text{Si}(n\text{Al})}}{\sum_{n=0}^{n=4} 0.25n I_{\text{Si}(n\text{Al})}}$$

Temperature-programmed desorption of ammonia ( $\text{NH}_3$ -TPD) experiments were

carried out on a Micromeritics AutoChem II 2920. Fourier Transform infrared spectroscopy (FT-IR) spectra were recorded on a Bruker VERTEXV 80V spectrometer using KBr pellets, with baseline correction applied after measurement. Diffuse reflectance ultraviolet-visible (UV-vis) spectra were collected on a PerkinElmer Lambda 950 in the range of 200–800 nm and deconvolved with Gaussian functions. Prior to measurement, all samples were dehydrated at 400 °C for 1 h in air. Elemental analysis was carried on using an Elementar Vario MACRO cube CHNS analyzer.

## 1.7 Catalysis

Methylamine synthesis was evaluated in a fixed-bed quartz tubular reactor under atmospheric pressure. Zeolite catalysts were pelletized, crushed, and sieved to 40–60 mesh, then activated at 350 °C for 1 h under a nitrogen flow of 50 mL/min.

After activation, the catalysts were exposed to a feed mixture of ammonia and methanol carried by nitrogen. Reactions were conducted at 350–400 °C with a methanol weight hourly space velocity (WHSV) of 0.813–4.3 h<sup>-1</sup>. Products were analyzed online using an Agilent 7890A gas chromatograph equipped with a flame ionization detector and a CP-Volamine capillary column. Data collection began immediately upon introduction of the feed and continued for 0.5 h. Methanol conversion and methylamine selectivity were calculated accordingly:

$$\text{MeOH conversion} = \frac{\text{moles of MeOH (in)} - \text{moles of MeOH (out)}}{\text{moles of MeOH (in)}} \times 100\%$$

$$\text{selectivity of MMA} = \frac{\text{moles of MMA}}{\text{moles of products detected}} \times 100\%$$

$$\text{selectivity of DMA} = \frac{\text{moles of DMA}}{\text{moles of products detected}} \times 100\%$$

$$\text{selectivity of TMA} = \frac{\text{moles of TMA}}{\text{moles of products detected}} \times 100\%$$

$$\text{selectivity of DME} = \frac{\text{moles of DME}}{\text{moles of products detected}} \times 100\%$$

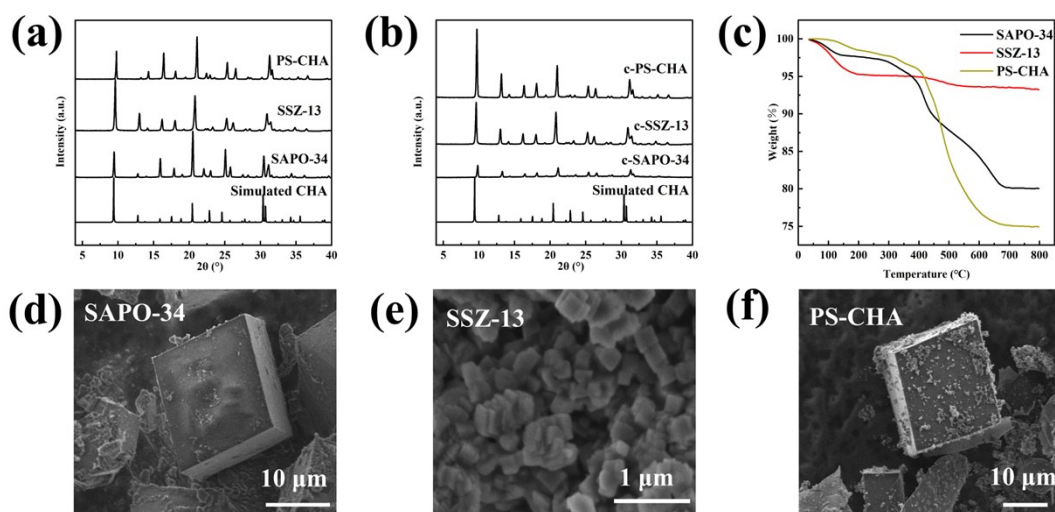

**Fig. S1** XRD patterns of (a) three kinds of seed crystals and (b) calcined seed crystals, (c) TG curves of three kinds of seeds, SEM images of (d) SAPO-34, (e) SSZ-13, and (f) PS-CHA.

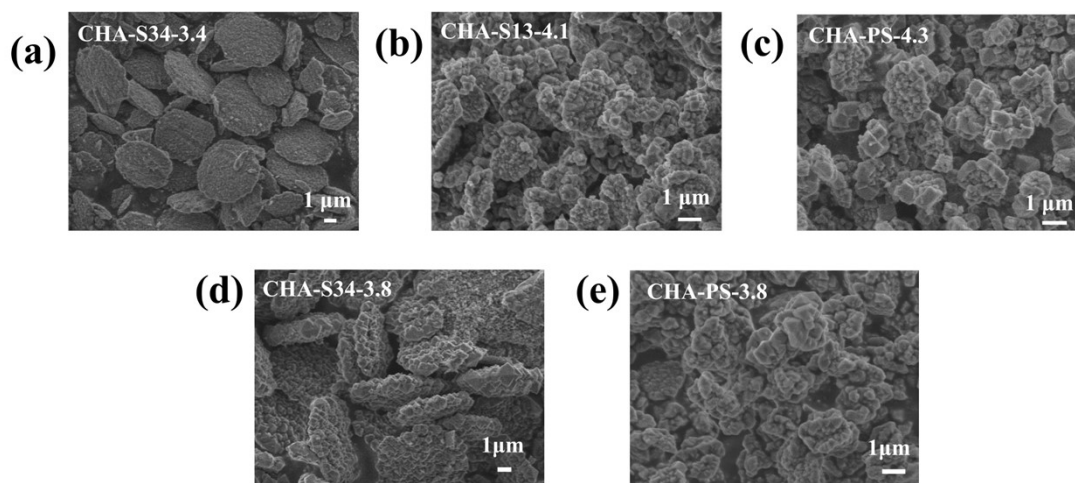

**Fig. S2** SEM images of (a) CHA-S34-3.4, (b) CHA-S13-4.1, (c) CHA-PS-4.3, (d) CHA-S34-3.8, and (e) CHA-PS-3.8.

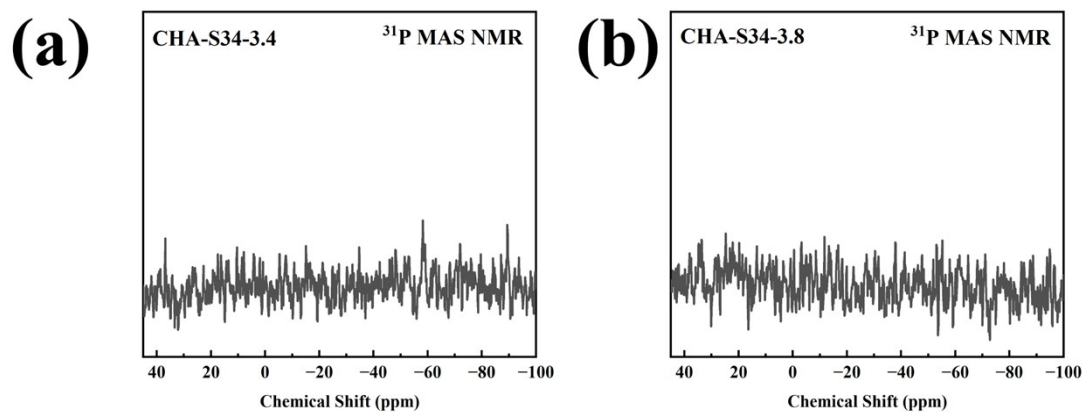

**Fig. S3**  $^{31}\text{P}$  MAS NMR spectrum of (a) CHA-S34-3.4 and (b) CHA-S34-3.8.

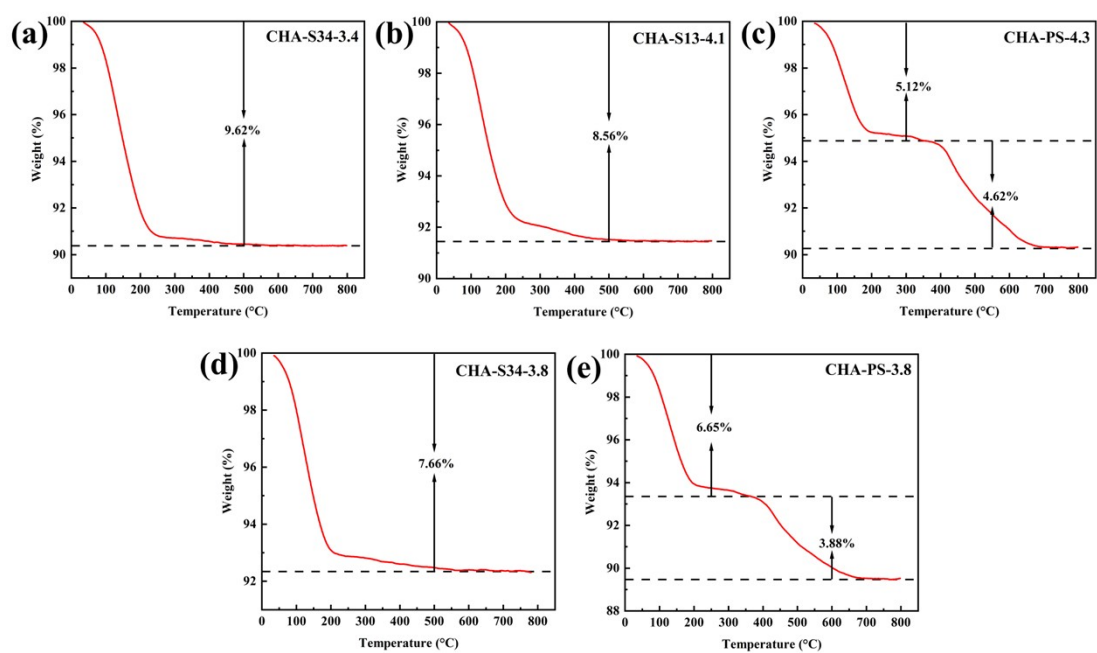

**Fig. S4** TG curves of (a) CHA-S34-3.4, (b) CHA-S13-4.1, (c) CHA-PS-4.3, (d) CHA-S34-3.8, and (e) CHA-PS-3.8.

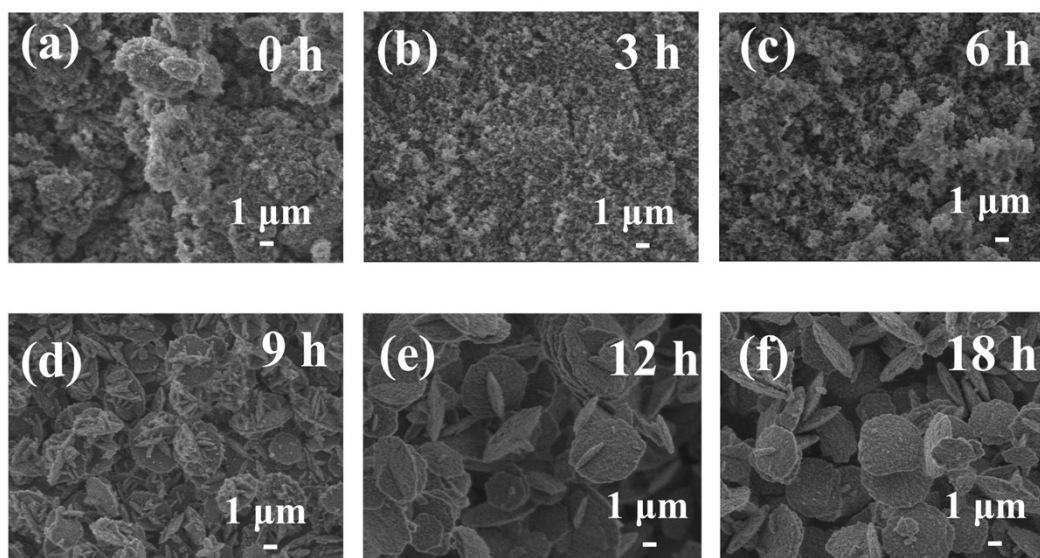

**Fig. S5** SEM images of the CHA-S34-3.4 solid products extracted at periodic times: (a) 0 h, (b) 3 h, (c) 6 h, (d) 9 h, (e) 12 h, and (f) 18 h.

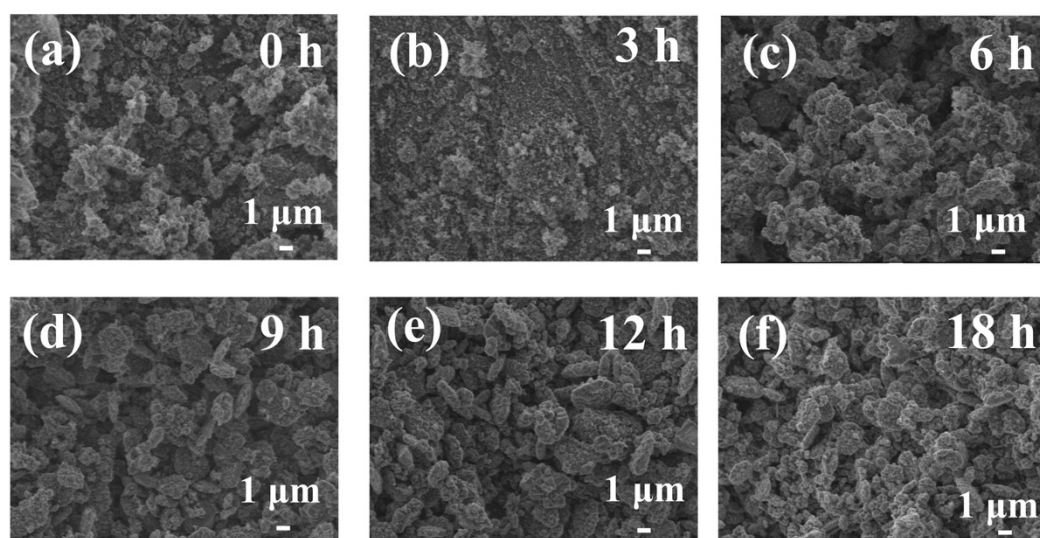

**Fig. S6** SEM images of the CHA-S13-4.1 solid products extracted at periodic times: (a) 0 h, (b) 3 h, (c) 6 h, (d) 9 h, (e) 12 h, and (f) 18 h.



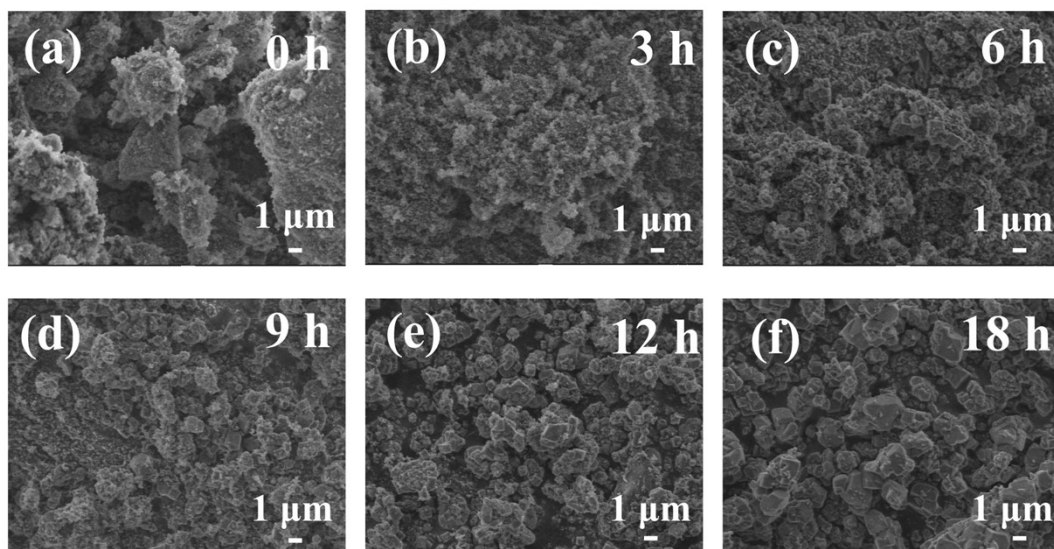

**Fig. S7** SEM images of the CHA-PS-4.3 solid products extracted at periodic times: (a) 0 h, (b) 3 h, (c) 6 h, (d) 9 h, (e) 12 h, and (f) 18 h.

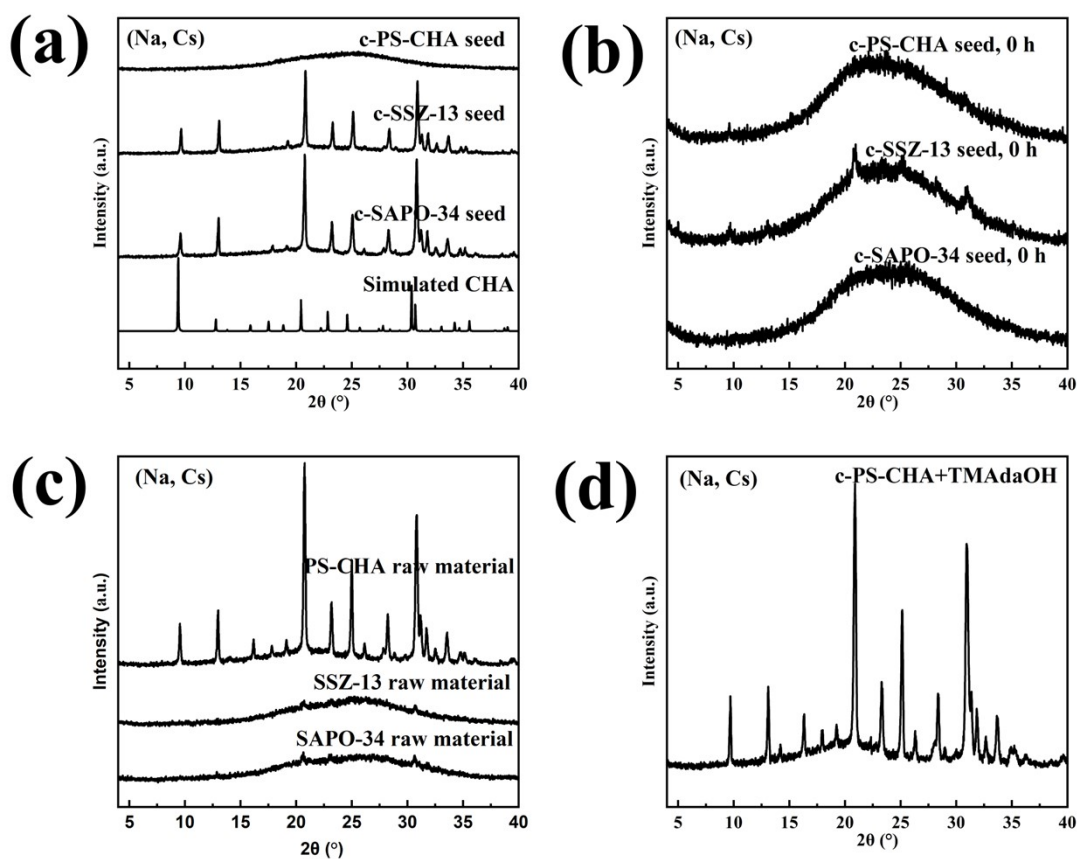

**Fig. S8** XRD patterns of the products: (a) after calcination of the three seeds; (b) at 0 h of crystallization using the three seeds; (c) when the seeds were replaced with raw materials; (d) using c-PS-CHA and TMAdaOH instead of PS-CHA.

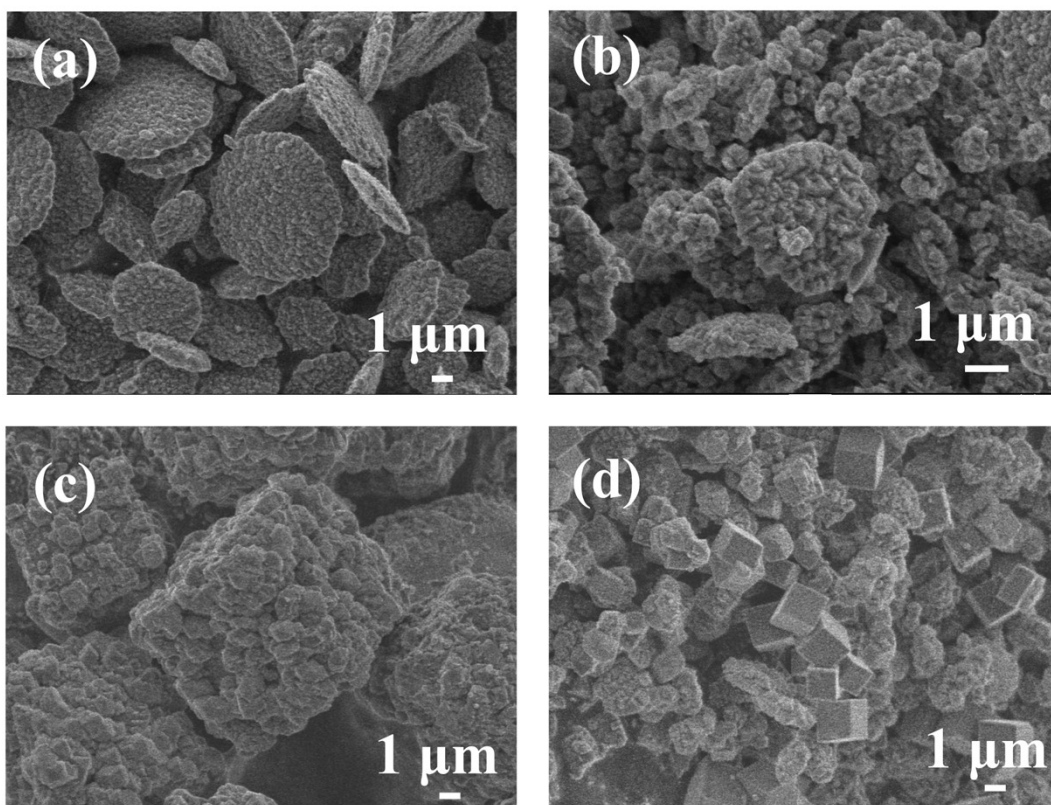

**Fig. S9** SEM images of the products obtained under different seeding conditions: (a) calcined SAPO-34, (b) calcined SSZ-13, (c) fumed silica and TMAdaOH replacing PS-CHA, and (d) c-PS-CHA and TMAdaOH replacing PS-CHA.

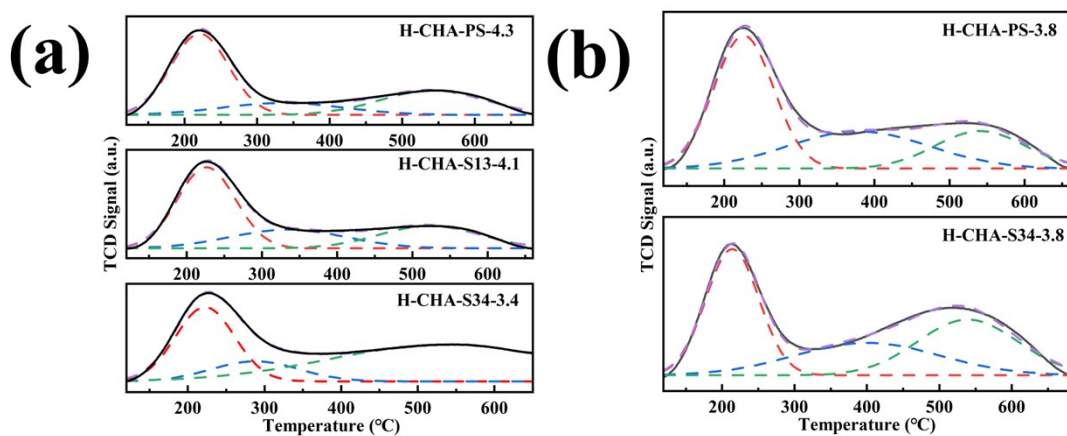

**Fig. S10** (a)  $\text{NH}_3$ -TPD profiles of H-CHA-S34-3.4, H-CHA-S13-4.1, and H-CHA-PS-4.3, (b)  $\text{NH}_3$ -TPD profiles of H-CHA-S34-3.8, and H-CHA-PS-3.8.

**Table S1** Proportion of Si species in five **CHA** zeolites.

| Sample      | Proportion of Si species (%) |             |             |
|-------------|------------------------------|-------------|-------------|
|             | Si(4Si,0Al)                  | Si(3Si,1Al) | Si(2Si,2Al) |
| CHA-S34-3.4 | 17.2                         | 52.6        | 30.2        |
| CHA-S13-4.1 | 25.8                         | 54.3        | 19.9        |
| CHA-PS-4.3  | 28.2                         | 51.4        | 20.4        |
| CHA-S34-3.8 | 22.8                         | 54.8        | 22.4        |
| CHA-PS-3.8  | 21.2                         | 52.0        | 26.8        |

**Table S2** The Si/Al ratios of the products with different kinds and different amounts of seeds.

| Sample  | Si/Al <sup>a</sup> |     |     |     |
|---------|--------------------|-----|-----|-----|
|         | 5%                 | 10% | 15% | 20% |
| CHA-S34 | 3.6                | 3.5 | 3.4 | 3.4 |
| CHA-S13 | 3.6                | 3.7 | 3.9 | 4.1 |
| CHA-PS  | 3.7                | 4.0 | 4.2 | 4.3 |

<sup>a</sup> Determined by the ICP analyses.

**Table S3** The acidic properties of Acidic properties of five **CHA** zeolites.

| Sample        | Center of Acid Sites (°C) |        |        | Amount of Acid Sites (%) <sup>a</sup> |            |       |
|---------------|---------------------------|--------|--------|---------------------------------------|------------|-------|
|               | Weak                      | Medium | Strong | Medium                                |            | total |
|               |                           |        |        | Weak                                  | and Strong |       |
| H-CHA-S34-3.4 | 222                       | 287    | 535    | 34.4                                  | 65.6       | 100   |
| H-CHA-S13-4.1 | 226                       | 335    | 523    | 41.5                                  | 38.7       | 80.2  |
| H-CHA-PS-4.3  | 221                       | 336    | 542    | 42.6                                  | 36.5       | 79.1  |
| H-CHA-S34-3.8 | 214                       | 400    | 539    | 38.1                                  | 58.2       | 96.3  |
| H-CHA-PS-3.8  | 226                       | 379    | 541    | 39.6                                  | 42.9       | 82.5  |

<sup>a</sup> The value was calculated by comparing the area of each acid sites with the total area of H-CHA-S34-3.4.

## References

1. S. Mintova, Verified Syntheses of Zeolitic Materials Third Revised Edition, [https://www.iza-online.org/synthesis/VS\\_3rdEd.pdf](https://www.iza-online.org/synthesis/VS_3rdEd.pdf).
2. E. A. Eilertsen, B. Arstad, S. Svelle and K. P. Lillerud, Single parameter synthesis of high silica **CHA** zeolites from fluoride media, *Microporous Mesoporous Mater.*, 2012, **153**, 94–99.
